# Supplementary material for: Demonstrated gradual evolution of disorder in crystalline structures between single crystal and polycrystal via chemical and physicochemical approaches
Source: Royal Society of Chemistry journal article supplement (doi:10.1039/d2ce00657j), 2022-01-01
Supplement: d2ce00657j1.pdf [file d2ce00657j1.pdf]

## Supproting Information

### Demonstrated Gradual Evolution of Disorder in Crystalline Structures between Single Crystal and Polycrystal via Chemical and Physicochemical Approaches

Sayako Kanazawa,<sup>a</sup> Yuya Oaki,<sup>a</sup> and Hiroaki Imai<sup>a\*</sup>

<sup>a</sup>Department of Applied Chemistry, Faculty of Science and Technology, Keio University, 3-14-1 Hiyoshi, Kohoku-ku, Yokohama 223-8522, Japan.

\*E-mail: hiroaki@aplc.keio.ac.jp

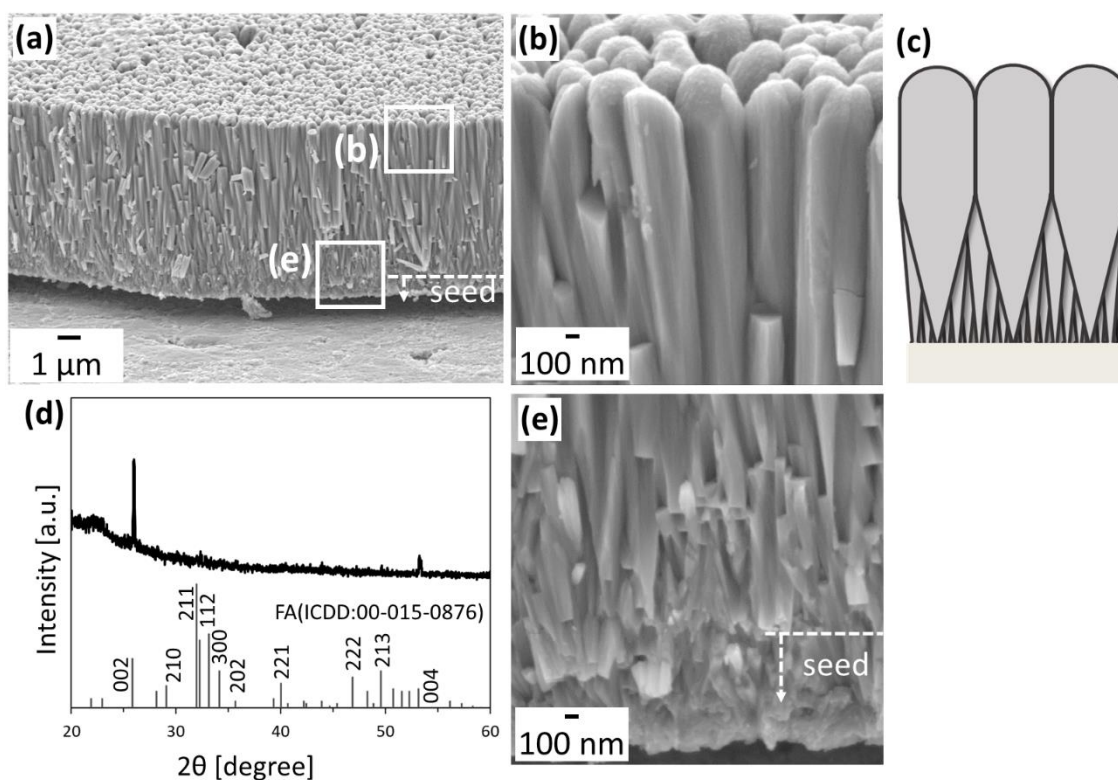

Fig. S1 SEM (a, b, e) and schematic (c) images of a cross-section and a typical X-ray diffraction pattern (d) of *c*-axis-oriented FA films after subsequent growth in s-SBF1.0 at  $[F^-] = 1.50 \text{ mmol/dm}^3$  for 24 h on the seed layer without stirring.<sup>1</sup>

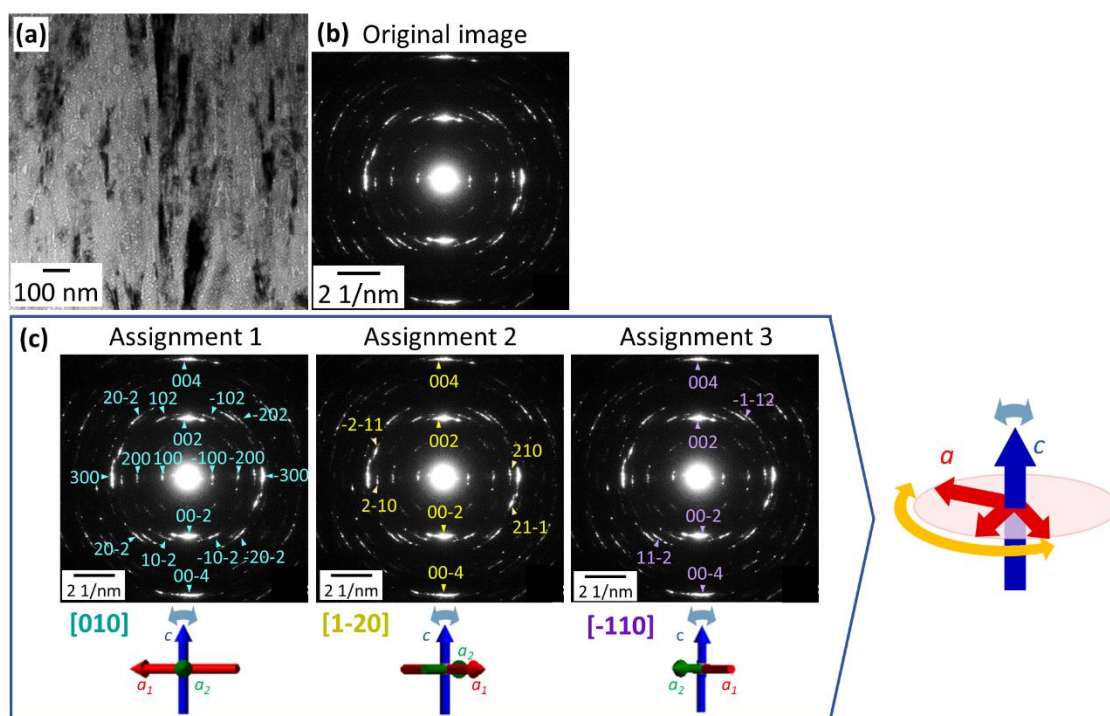

Fig. S2 Assignments of the SAED image (b, c) obtained from a TEM image (a) of c-axis-oriented FA nanorods after subsequent growth in s-SBF1.0 at  $[F^-] = 1.50 \text{ mmol/dm}^3$  with addition of acetic acid and without stirring.

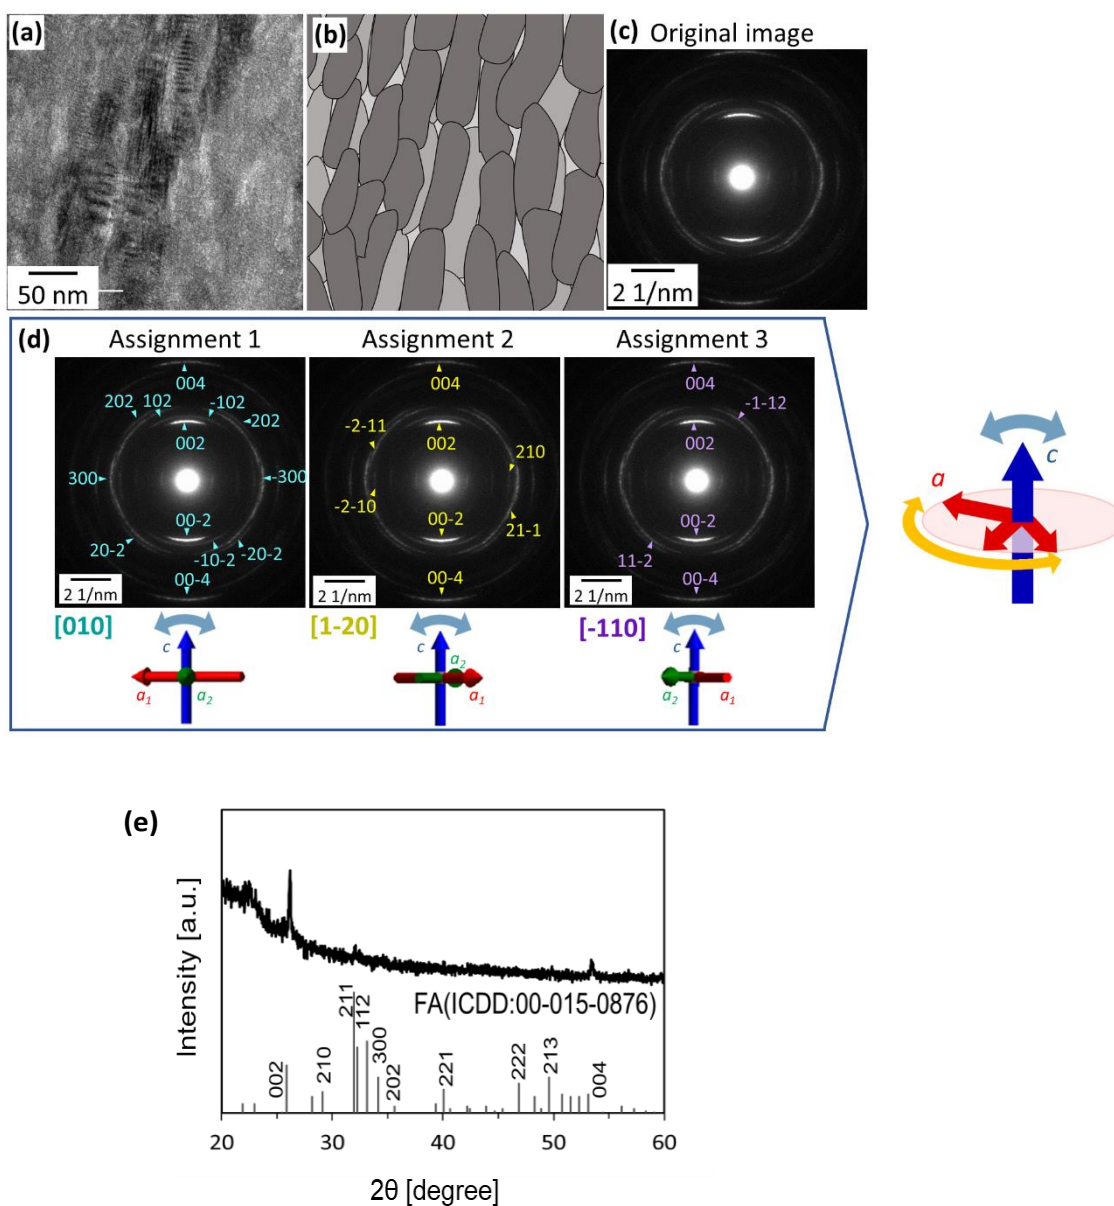

Fig. S3 Assignments of the SAED image (c, d) obtained from the TEM image (a) with a schematic illustration (b) showing a cross-sectional view and a typical X-ray diffraction pattern (e) of *c*-axis-oriented FA nanograins after subsequent growth in *s*-SBF1.0 at  $[F^-] = 1.50\ \text{mmol/dm}^3$  with addition of acetic acid and with stirring. The TEM image was obtained from an FIB-cut sample.

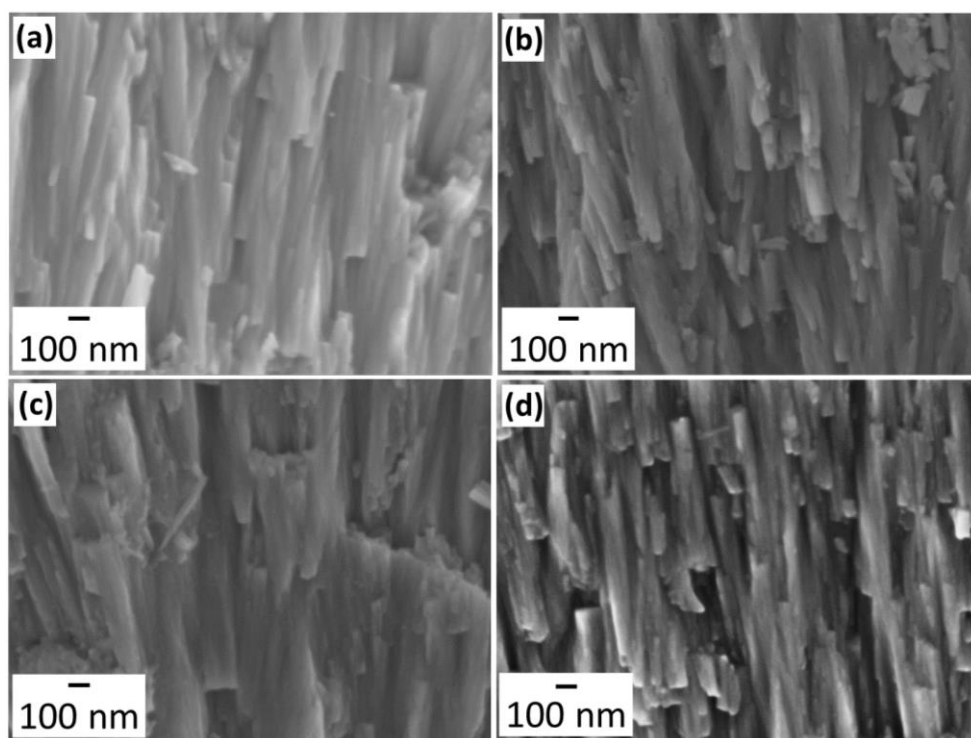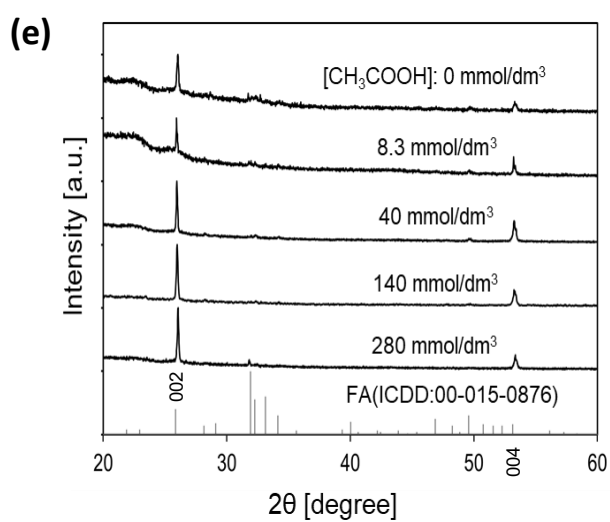

Fig. S4 SEM (a–d) of a cross-section and X-ray diffraction patterns (e) of *c*-axis-oriented FA films on a PVA sheet in *s*-SBF1.0 at  $[F^-] = 1.50 \text{ mmol/dm}^3$  with addition of acetic acid and without stirring. (a)  $[CH_3COOH] = 8.3 \text{ mmol/dm}^3$ , (b)  $[CH_3COOH] = 40 \text{ mmol/dm}^3$ , (c)  $[CH_3COOH] = 139 \text{ mmol/dm}^3$ , (d)  $[CH_3COOH] = 280 \text{ mmol/dm}^3$ .

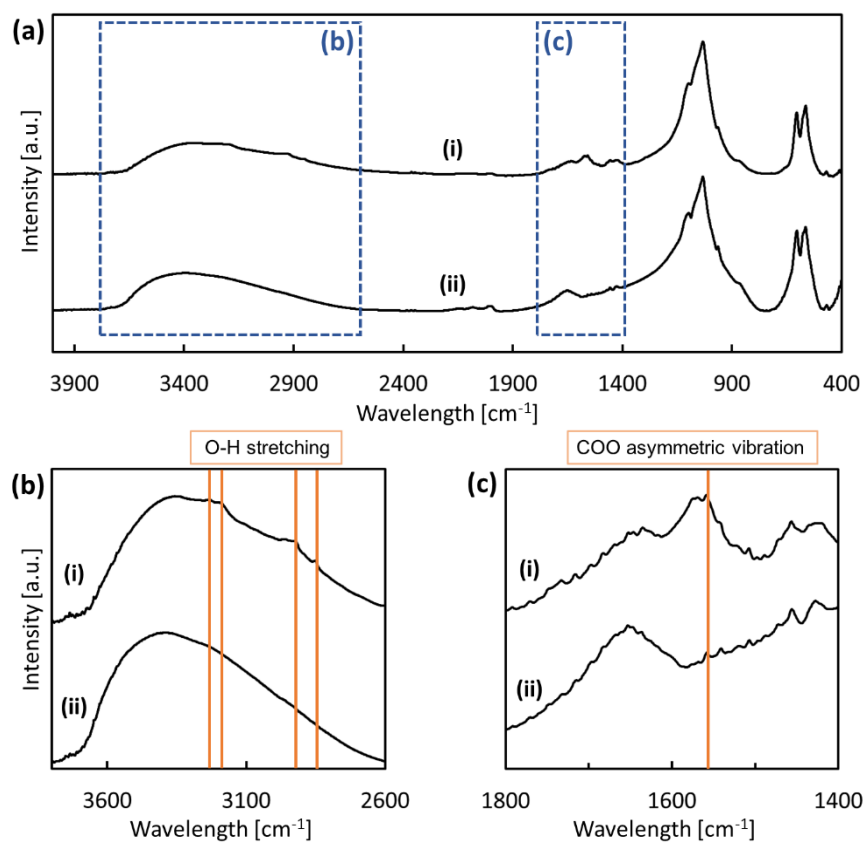

Fig. S5 FT-IR spectra (a–c) of films grown in in s-SBF1.0 at  $[F^-] = 1.50 \text{ mmol/dm}^3$  with (i) and without (ii) addition of acetic acid ( $280 \text{ mmol/dm}^3$ ).

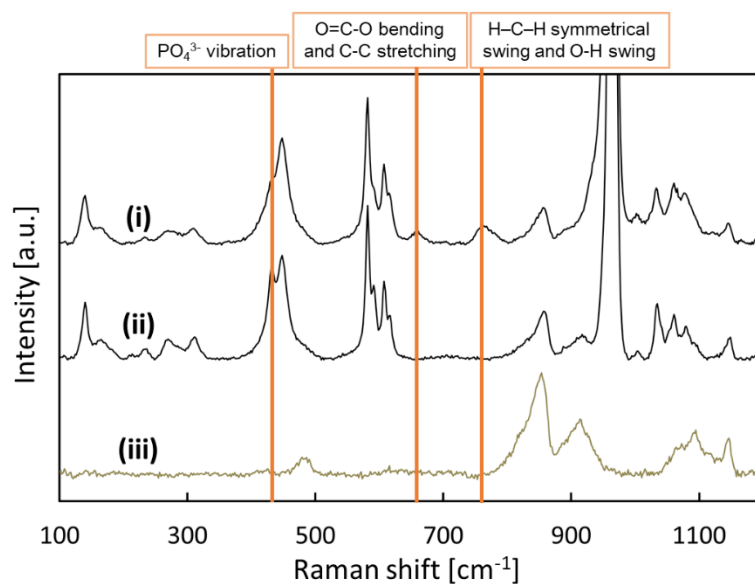

Fig. S6 Raman spectra of films grown in in s-SBF1.0 at  $[F^-] = 1.50 \text{ mmol dm}^{-3}$  with (i) and without (ii) addition of acetic acid ( $280 \text{ mmol /dm}^3$ ) and a PVA sheet (iii).

## Reference

- 1 S. Kanazawa, Y. Oaki and H. Imai, *Nanoscale Adv.*, 2022, **4**, 1538–1544.
